# Supplementary material for: Integrated Analysis of MicroRNA and mRNA Expression Profiles in the Fat Bodies of MbMNPV-Infected Helicoverpa armigera
Source: MDPI journal article supplement (doi:10.3390/v15010019), 2022-12-21
Supplement: s1 [file s1]

**Table S1.** Primers used for real-time PCR.

| Names              | Sequences (5'-3')                                       |
|--------------------|---------------------------------------------------------|
| RT-pca-bantam-3p   | GTCGTATCCAGTGCAGGGTCCGAGGTATTCTG<br>CACTGGATACGACATCAGC |
| F-pca-bantam-3p    | GCGCGTGAGATCATTGTGAAA                                   |
| RT-bmo-miR-2755-3p | GTCGTATCCAGTGCAGGGTCCGAGGTATTCTG<br>CACTGGATACGACAACAAG |
| F-bmo-miR-2755-3p  | GCGCACCTGTCTCAGACCATA                                   |
| RT-sfr-miR-6094-5p | GTCGTATCCAGTGCAGGGTCCGAGGTATTCTG<br>CACTGGATACGACAGGTAC |
| F-sfr-miR-6094-5p  | TCAGCGGTGGCCTGGG                                        |
| RT-mse-miR-34      | GTCGTATCCAGTGCAGGGTCCGAGGTATTCTG<br>CACTGGATACGACACAACC |
| F-mse-miR-34       | GCGTGGCAGTGTGGTTAGCT                                    |
| RT-novel1_star     | GTCGTATCCAGTGCAGGGTCCGAGGTATTCTG<br>CACTGGATACGACTCTCAT |
| F-novel1_star      | CCGCGTCATGCCAGGG                                        |
| RT-ame-miR-317-3p  | GTCGTATCCAGTGCAGGGTCCGAGGTATTCTG<br>CACTGGATACGACACTGAG |
| F-ame-miR-317-3p   | CGTGAACACAGCTGGTGGTAT                                   |
| F-actin            | CACCGCTGAGAGGGAAATC                                     |
| R-actin            | CATACCCAGGAAGGAAGGC                                     |
| R-universal        | AGTGCAGGGTCCGAGGTATT                                    |

|              |                                            |
|--------------|--------------------------------------------|
| F-eIF3-S7    | ATGCCTTACCAACCTTTCAGT                      |
| R-eIF3-S7    | CCTCGTAGTGTCCACCAGATG                      |
| F-CG7583     | GAGATGCCGATACTAAAAGACG                     |
| R-CG7583     | GACCCAATACGGACGATGAT                       |
| F-btf3l4     | AACACTTTCGCTATCACCG                        |
| R-btf3l4     | ATGCCAGCCTCTTCAGC                          |
| F-CG16901    | TAAAGTGATGGCTGCTGGCG                       |
| R-CG16901    | TGTCAAATGGCATCTCAACCTC                     |
| F-polh       | CGTAAACTGGAGCGGTAAA                        |
| R-polh       | GACTTCGTGGGGCACATAG                        |
| eIF3-S7-T7-F | TAATACGACTCACTATAGGGTGAGGAAGAGGAAAGTGAGGTC |
| eIF3-S7-T7-R | TAATACGACTCACTATAGGGTCAGCGGTTTGTTGGGGTC    |

---

**Table S2.** Primers used for synthesizing dsRNA.

| Names        | Sequences (5'-3')                          |
|--------------|--------------------------------------------|
| eIF3-S7-T7-F | TAATACGACTCACTATAGGGTGAGGAAGAGGAAAGTGAGGTC |
| eIF3-S7-T7-R | TAATACGACTCACTATAGGGTCAGCGGTTTGTTGGGGTC    |

**Table S3.** KEGG pathway enrichment analysis of DEmiRNAs targets.

| id       | Term                                                                    | ListHits | p-Value     | Enrichment_score |
|----------|-------------------------------------------------------------------------|----------|-------------|------------------|
| haw04310 | Wnt signaling pathway                                                   | 5        | 0.035712781 | 2.710832899      |
| haw00310 | Lysine degradation                                                      | 3        | 0.074366426 | 3.038986355      |
| haw00061 | Fatty acid biosynthesis                                                 | 2        | 0.085721851 | 4.051981806      |
| haw00270 | Cysteine and methionine metabolism                                      | 3        | 0.094110229 | 2.749559083      |
| haw04320 | Dorso-ventral axis formation                                            | 2        | 0.118769207 | 3.347289318      |
| haw04745 | Phototransduction - fly                                                 | 2        | 0.118769207 | 3.347289318      |
| haw00400 | Phenylalanine, tyrosine and tryptophan biosynthesis                     | 1        | 0.123390405 | 7.698765432      |
| haw04136 | Autophagy - other                                                       | 2        | 0.127468622 | 3.20781893       |
| haw04330 | Notch signaling pathway                                                 | 2        | 0.127468622 | 3.20781893       |
| haw04145 | Phagosome                                                               | 4        | 0.128903843 | 2.053004115      |
| haw00030 | Pentose phosphate pathway                                               | 2        | 0.154393253 | 2.851394604      |
| haw04122 | Sulfur relay system                                                     | 1        | 0.168422664 | 5.499118166      |
| haw00920 | Sulfur metabolism                                                       | 1        | 0.211168679 | 4.277091907      |
| haw04150 | mTOR signaling pathway                                                  | 4        | 0.215456069 | 1.673644659      |
| haw00532 | Glycosaminoglycan biosynthesis - chondroitin sulfate / dermatan sulfate | 1        | 0.231720412 | 3.849382716      |
| haw02010 | ABC transporters                                                        | 2        | 0.269086722 | 1.974042418      |
| haw00360 | Phenylalanine metabolism                                                | 1        | 0.271250322 | 3.20781893       |
| haw00592 | alpha-Linolenic acid metabolism                                         | 1        | 0.271250322 | 3.20781893       |
| haw04711 | Circadian rhythm - fly                                                  | 1        | 0.290255062 | 2.961063628      |
| haw00520 | Amino sugar and nucleotide sugar metabolism                             | 2        | 0.307991188 | 1.790410566      |

**Table S4.** Sequences for miRNA agomir and antagomir.

| Names                         | Sequences (5'-3')       |
|-------------------------------|-------------------------|
| sfr-miR-6094-5p agomir        | AUCAGCGGUGGCCUGGGGUACCU |
| sfr-miR-6094-5p antagomir     | GUACCCCAGGCCACCGCUGAUUU |
| Negative control of agomir    | UUCUCCGAACGUGUCACGUTT   |
| Negative control of antagomir | CAGUACUUUUGUGUAGUACAA   |
